# Supplementary material
Source: Springer Nature journal article supplement (https://www.springermedizin.de/resource/supplementary/12889_2010_2486_MOESM1_ESM.pdf/9486086)
Supplement: MOESM1 [file 9486086]

**Phase I (0 to 3 months)**

At baseline participants will be randomly assigned to one of two diets and commenced on metformin

**High carbohydrate, low fat diet**  
  
(n=54)

**Moderate carbohydrate, increased protein**  
  
(n=54)

Medical consultation  
Dietitian consultation  
Dietitian support<sup>a</sup>

**Intensive dietary intervention**  
week 0 & 12  
week 0, 2, 6 & 12  
week 4 & 9<sup>b</sup>

**Intensive dietary intervention**  
week 0 & 12  
week 0, 2, 6 & 12  
week 4 & 9<sup>b</sup>

**Phase II (4 to 6 months)**

**Intensive exercise intervention**  
Participants will continue with their prescribed diet  
week 26  
twice a week  
once a week  
week 16, 20, & 24  
week 26

Medical consultation  
Gym sessions  
Home based PA  
Dietitian support<sup>a</sup>  
Dietitian consultation

**Phase III (7 to 12 months)**

**Maintenance**  
Participants will continue prescribed diet and exercise routine  
week 38, 52  
week 32, 38<sup>b</sup>, 44  
week 52

Medical consultation  
Dietitian support<sup>a</sup>  
Dietitian consultation

<sup>a</sup> Dietitian will make contact with the families by either phone, email or SMS

<sup>b</sup> 24 hour food recall by the research dietitian (via phone)
